# Supplementary material for: Copper(i)-catalyzed asymmetric aza Diels–Alder reactions of azoalkenes toward fulvenes: a molecular electron density theory study
Source: Royal Society of Chemistry journal article supplement (doi:10.1039/c9nj00269c), 2019-01-01
Supplement: c9nj00269c1.pdf [file c9nj00269c1.pdf]

## Electronic Supplementary Information

### Copper (I)-Catalyzed Asymmetric Aza Diels-Alder Reaction of Azoalkenes Toward Fulvenes: A Molecular Electron Density Theory Study

Saeedreza Emamian,<sup>\*a</sup> Mousa Soleymani<sup>b</sup> and Samira Sadat Moosavi<sup>a</sup>

<sup>a</sup>*Chemistry Department, Shahrood Branch, Islamic Azad University, Shahrood, Iran.*

<sup>b</sup>*Chemistry Department, Faculty of Science, Ayatollah Boroujerdi University, Borujerd, Iran.*

\*Corresponding author. Tel.: +98 9121735085; Fax: +98 2332390537.

E-mail address: s\_emamian@iau-shahrood.ac.ir & saeedreza\_em@yahoo.com

ORCID ID: <https://orcid.org/0000-0001-8223-1264>

#### Contents

- S2** B3LYP/6-31G(d) Cartesian coordinates of optimized structures in the presence of DCM involved in the uncatalyzed as well as catalyzed studied ADA reaction.
- S18** Values of different terms employed in equation (1) for the located stationary points (Table S1).

**AD-2**

|   |             |             |             |
|---|-------------|-------------|-------------|
| C | -1.68775700 | 0.96133300  | 0.67077400  |
| C | -1.71840300 | 1.79690000  | 1.72485200  |
| H | -0.83729100 | 2.36591200  | 2.00309100  |
| H | -2.62777100 | 1.96506100  | 2.29201600  |
| N | 0.56835800  | 0.97377900  | 0.43081600  |
| N | -0.52842500 | 0.89591300  | -0.16288500 |
| C | -2.82919900 | 0.15353100  | 0.17589500  |
| C | -3.83602000 | -0.27348500 | 1.05910400  |
| C | -2.92266200 | -0.20914500 | -1.17951900 |
| C | -4.91612500 | -1.02301500 | 0.59666100  |
| H | -3.76268300 | -0.03344500 | 2.11590100  |
| C | -4.00509700 | -0.96043800 | -1.63814400 |
| H | -2.15146300 | 0.10889500  | -1.87241600 |
| C | -5.00661800 | -1.36864600 | -0.75491900 |
| H | -5.68314600 | -1.34667100 | 1.29523900  |
| H | -4.06482700 | -1.22529400 | -2.69052500 |
| H | -5.84698400 | -1.95667300 | -1.11403000 |
| C | 1.70214800  | 1.07335200  | -0.46879100 |
| O | 1.71007500  | 1.89893300  | -1.36455100 |
| C | 2.83306500  | 0.17963400  | -0.13198300 |
| C | 2.79042400  | -0.69058200 | 0.97058400  |
| C | 3.96371600  | 0.19213100  | -0.96697200 |
| C | 3.86667400  | -1.53808100 | 1.22941200  |
| H | 1.92319300  | -0.69519300 | 1.62256500  |
| C | 5.03530900  | -0.65471500 | -0.70315900 |
| H | 3.98363500  | 0.86760600  | -1.81631200 |
| C | 4.98753500  | -1.52124600 | 0.39499400  |
| H | 3.83202500  | -2.20943500 | 2.08268200  |
| H | 5.90763300  | -0.64347700 | -1.35053600 |
| H | 5.82561700  | -2.18177900 | 0.60048700  |

**FU-3**

|   |             |             |             |
|---|-------------|-------------|-------------|
| C | 0.97253600  | 1.17338400  | -0.00363900 |
| C | 2.25924700  | 0.73218100  | -0.00378100 |
| C | 2.25925200  | -0.73217500 | 0.00378700  |
| C | 0.97254300  | -1.17339000 | 0.00363000  |
| H | 0.64646000  | 2.20586300  | -0.01425100 |
| H | 3.15120200  | 1.35034000  | -0.00980900 |
| H | 3.15120600  | -1.35033500 | 0.00982800  |
| H | 0.64650400  | -2.20588100 | 0.01420500  |
| C | 0.08319100  | -0.00000900 | 0.00000300  |
| C | -1.28024500 | 0.00000500  | 0.00001700  |
| C | -2.09767000 | 1.26157800  | 0.00746200  |
| H | -2.69195100 | 1.33074800  | -0.91468600 |
| H | -2.82027300 | 1.23896600  | 0.83463000  |
| H | -1.49893300 | 2.16940800  | 0.09841000  |
| C | -2.09769200 | -1.26156800 | -0.00745600 |
| H | -1.49893600 | -2.16937400 | -0.09855400 |
| H | -2.69193600 | -1.33087900 | 0.91470200  |
| H | -2.82030500 | -1.23889300 | -0.83461400 |

**TS-1x**

|   |             |             |            |
|---|-------------|-------------|------------|
| C | -2.07871100 | -0.22510200 | 0.60312600 |
| C | -1.64668300 | 0.94402600  | 1.25162100 |
| H | -0.66741600 | 0.92986600  | 1.71276100 |
| H | -2.37446600 | 1.60327200  | 1.71036200 |
| N | 0.07035300  | -0.85070700 | 0.30183900 |
| N | -1.18168100 | -1.10018400 | 0.07618400 |
| C | -3.50185900 | -0.50109000 | 0.28816600 |

|   |             |             |             |
|---|-------------|-------------|-------------|
| C | -4.55020400 | 0.13630400  | 0.97950000  |
| C | -3.84410700 | -1.42231000 | -0.72276300 |
| C | -5.88371600 | -0.12584800 | 0.66466600  |
| H | -4.32970800 | 0.82883800  | 1.78644300  |
| C | -5.17682700 | -1.68811300 | -1.02982200 |
| H | -3.04942500 | -1.92079400 | -1.26688600 |
| C | -6.20621000 | -1.03901900 | -0.34165200 |
| H | -6.67260100 | 0.37895900  | 1.21660200  |
| H | -5.41256100 | -2.40002300 | -1.81702500 |
| H | -7.24535800 | -1.24448300 | -0.58477200 |
| C | 0.92556700  | -1.69963700 | -0.44455700 |
| O | 0.61141200  | -2.24428900 | -1.49998200 |
| C | 2.29837200  | -1.84442800 | 0.13448700  |
| C | 2.68809600  | -1.21645500 | 1.32916500  |
| C | 3.22207300  | -2.65722500 | -0.54398500 |
| C | 3.97809600  | -1.39764400 | 1.82981500  |
| H | 1.98007300  | -0.58882200 | 1.85773200  |
| C | 4.50856100  | -2.83708300 | -0.04268500 |
| H | 2.91078600  | -3.14075700 | -1.46442100 |
| C | 4.89027900  | -2.20570300 | 1.14625200  |
| H | 4.27080200  | -0.90777800 | 2.75471700  |
| H | 5.21497800  | -3.46828700 | -0.57540200 |
| H | 5.89466100  | -2.34466000 | 1.53783100  |
| C | -1.08727800 | 2.36782800  | -0.20534300 |
| C | 0.04100200  | 1.83177800  | -0.84816200 |
| C | 0.72998300  | 3.58368300  | 0.53601400  |
| H | -2.08472300 | 2.32014200  | -0.62827300 |
| H | 0.01593800  | 1.08041400  | -1.62378800 |
| H | 1.35994400  | 4.28607800  | 1.06720000  |
| C | -0.61742000 | 3.49810600  | 0.62320900  |
| C | 1.21539600  | 2.56088800  | -0.41074300 |
| C | 2.49895000  | 2.39088600  | -0.86454800 |
| H | -1.26676100 | 4.11621900  | 1.23346000  |
| C | 2.86964400  | 1.36554400  | -1.89393900 |
| H | 3.16432300  | 1.87277100  | -2.82425600 |
| H | 3.74952700  | 0.79885200  | -1.56515300 |
| H | 2.06880200  | 0.66286700  | -2.12678500 |
| C | 3.64005400  | 3.24549100  | -0.39928900 |
| H | 3.34625800  | 4.03223600  | 0.29687100  |
| H | 4.39889000  | 2.61685000  | 0.08732800  |
| H | 4.13769400  | 3.70952500  | -1.26204900 |

**TS-1n**

|   |             |             |             |
|---|-------------|-------------|-------------|
| C | -1.62984000 | -1.02509800 | 0.56493000  |
| C | -1.42405700 | -0.82892800 | 1.93837500  |
| H | -0.46738000 | -1.12028100 | 2.35388700  |
| H | -2.26817600 | -0.87012300 | 2.61754200  |
| N | 0.59269400  | -0.86967500 | 0.22099800  |
| N | -0.58937300 | -0.96170000 | -0.30668700 |
| C | -2.97440200 | -1.14488300 | -0.04994400 |
| C | -4.08566900 | -1.58738400 | 0.69191800  |
| C | -3.16877600 | -0.83365800 | -1.41037700 |
| C | -5.34511500 | -1.69803500 | 0.10149400  |
| H | -3.96644200 | -1.87209100 | 1.73344300  |
| C | -4.42549800 | -0.95323800 | -1.99991700 |
| H | -2.32160300 | -0.49098200 | -1.99459300 |
| C | -5.52318100 | -1.38101800 | -1.24698100 |
| H | -6.18649600 | -2.04477800 | 0.69620600  |
| H | -4.55019700 | -0.70225300 | -3.05040700 |
| H | -6.50370600 | -1.47035400 | -1.70718500 |
| C | 1.59156700  | -0.58804000 | -0.73869600 |
| O | 1.38702800  | 0.02616600  | -1.78361700 |

|   |             |             |             |
|---|-------------|-------------|-------------|
| C | 2.96158800  | -1.05347000 | -0.35244100 |
| C | 3.21998800  | -1.72474600 | 0.85429300  |
| C | 4.01553900  | -0.84389900 | -1.25723700 |
| C | 4.50919500  | -2.16922700 | 1.14970800  |
| H | 2.40970000  | -1.89473200 | 1.55404200  |
| C | 5.30108600  | -1.29022600 | -0.96186700 |
| H | 3.80562900  | -0.33111200 | -2.19051600 |
| C | 5.55117200  | -1.95430900 | 0.24381700  |
| H | 4.69997400  | -2.68671600 | 2.08621900  |
| H | 6.10865600  | -1.12426900 | -1.67001500 |
| H | 6.55451200  | -2.30242100 | 0.47527200  |
| C | 0.21325200  | 1.52898100  | 1.64461800  |
| C | -1.00443800 | 1.23278600  | 2.28448700  |
| C | -2.06264300 | 1.96291100  | 1.56105400  |
| C | -1.51777000 | 2.58812600  | 0.49241500  |
| H | 1.19139400  | 1.26768900  | 2.02206500  |
| H | -1.05912000 | 0.99662600  | 3.34213600  |
| H | -3.11345200 | 1.93470100  | 1.82662800  |
| H | -2.05523600 | 3.15934700  | -0.25404300 |
| C | -0.05597100 | 2.38576200  | 0.50735000  |
| C | 0.87123400  | 2.96555100  | -0.32144400 |
| C | 2.35041400  | 2.79283700  | -0.13826200 |
| H | 2.82986600  | 2.57294800  | -1.09868300 |
| H | 2.78529000  | 3.73867400  | 0.21715800  |
| H | 2.61695700  | 2.00910800  | 0.57175100  |
| C | 0.48715900  | 3.87211400  | -1.45291400 |
| H | -0.58101300 | 4.08953000  | -1.49877400 |
| H | 1.03642900  | 4.82098300  | -1.38377300 |
| H | 0.78593600  | 3.41334300  | -2.40587100 |

**CA-1x**

|   |             |             |             |
|---|-------------|-------------|-------------|
| C | 2.23735200  | 0.17895700  | -0.26717900 |
| C | 1.73157800  | 1.38571300  | -1.02075800 |
| H | 1.32413300  | 1.01901600  | -1.97328600 |
| H | 2.52505900  | 2.09698600  | -1.25357800 |
| N | 0.04925700  | -0.31927000 | 0.06155200  |
| N | 1.39966500  | -0.66975700 | 0.23273500  |
| C | 3.68198600  | -0.12325100 | -0.11699700 |
| C | 4.64925500  | 0.49269700  | -0.92968300 |
| C | 4.11148100  | -1.06169800 | 0.84176800  |
| C | 6.00221600  | 0.17646200  | -0.79230500 |
| H | 4.35179300  | 1.20899900  | -1.68888900 |
| C | 5.46097000  | -1.37367800 | 0.97782100  |
| H | 3.37246800  | -1.53581600 | 1.47904900  |
| C | 6.41422500  | -0.75511900 | 0.16152400  |
| H | 6.73311600  | 0.65964500  | -1.43536400 |
| H | 5.77258200  | -2.09684600 | 1.72701600  |
| H | 7.46813000  | -0.99669700 | 0.27124600  |
| C | -0.80731100 | -1.42407300 | 0.28940100  |
| O | -0.43231000 | -2.44165400 | 0.85718900  |
| C | -2.16166300 | -1.37769900 | -0.34929600 |
| C | -2.38762800 | -0.73932100 | -1.57736100 |
| C | -3.19473800 | -2.12719800 | 0.23539200  |
| C | -3.63559100 | -0.82786800 | -2.19590900 |
| H | -1.58436800 | -0.18545500 | -2.04999600 |
| C | -4.44614700 | -2.19803800 | -0.37343900 |
| H | -3.00420700 | -2.64937700 | 1.16788500  |
| C | -4.66913200 | -1.54794600 | -1.59173500 |
| H | -3.79899700 | -0.33712000 | -3.15175900 |
| H | -5.24444000 | -2.76724000 | 0.09533000  |
| H | -5.64196700 | -1.61148300 | -2.07226000 |
| C | 0.60166300  | 2.07960100  | -0.23046400 |

|   |             |             |             |
|---|-------------|-------------|-------------|
| C | -0.22486700 | 1.06798000  | 0.60880200  |
| C | -1.68675800 | 2.49670500  | -0.63150300 |
| H | 1.06113700  | 2.80159500  | 0.45941600  |
| H | 0.13210000  | 1.03656400  | 1.64330400  |
| H | -2.59647600 | 2.91592200  | -1.04772600 |
| C | -0.44689000 | 2.77252200  | -1.06920500 |
| C | -1.65546800 | 1.59283100  | 0.52897000  |
| C | -2.62646000 | 1.40034300  | 1.44980800  |
| H | -0.19745900 | 3.43610400  | -1.89236000 |
| C | -2.45659800 | 0.53028000  | 2.66840200  |
| H | -2.63864600 | 1.11436900  | 3.58198700  |
| H | -3.19984600 | -0.27882200 | 2.66909300  |
| H | -1.46671100 | 0.07530900  | 2.75276200  |
| C | -3.98821800 | 2.04043900  | 1.34720300  |
| H | -4.10804600 | 2.67424200  | 0.46581100  |
| H | -4.77117500 | 1.26968600  | 1.31943700  |
| H | -4.19171000 | 2.65501100  | 2.23581700  |

**CA-1n**

|   |             |             |             |
|---|-------------|-------------|-------------|
| C | -1.67910400 | -0.73931000 | 0.26944300  |
| C | -1.20092500 | -0.97897900 | 1.68425300  |
| H | -0.65138600 | -1.93037100 | 1.69295000  |
| H | -2.02824000 | -1.06766000 | 2.39037400  |
| N | 0.49159100  | -0.35574600 | -0.18070300 |
| N | -0.82612700 | -0.47311700 | -0.66693300 |
| C | -3.10810600 | -0.82043500 | -0.11529100 |
| C | -4.03518700 | -1.53642900 | 0.66149300  |
| C | -3.55786300 | -0.19287600 | -1.29275800 |
| C | -5.37147100 | -1.62716000 | 0.26867600  |
| H | -3.71594900 | -2.04539600 | 1.56551600  |
| C | -4.89230300 | -0.28084400 | -1.67907000 |
| H | -2.84982400 | 0.37065100  | -1.89111500 |
| C | -5.80569000 | -0.99828900 | -0.89941500 |
| H | -6.07249300 | -2.19118700 | 0.87809600  |
| H | -5.22336200 | 0.21664200  | -2.58684500 |
| H | -6.84820800 | -1.06272200 | -1.19952700 |
| C | 1.47160200  | -0.90387900 | -0.98366300 |
| O | 1.21906400  | -1.38365200 | -2.08779600 |
| C | 2.87333700  | -0.99959700 | -0.43773500 |
| C | 3.15395300  | -1.44550800 | 0.86251000  |
| C | 3.93587900  | -0.77622400 | -1.32691200 |
| C | 4.47505500  | -1.63803700 | 1.27230300  |
| H | 2.34097900  | -1.66766900 | 1.54750300  |
| C | 5.25462100  | -0.95161200 | -0.91103700 |
| H | 3.71619300  | -0.46737400 | -2.34426500 |
| C | 5.52746800  | -1.38299900 | 0.39066300  |
| H | 4.67993500  | -1.99361100 | 2.27855400  |
| H | 6.06918900  | -0.76113300 | -1.60464700 |
| H | 6.55531100  | -1.52861900 | 0.71228900  |
| C | 0.66249800  | 0.59900500  | 0.93587100  |
| C | -0.24460800 | 0.15951200  | 2.13117600  |
| C | -0.99525300 | 1.41514500  | 2.49174200  |
| C | -0.76225800 | 2.41540800  | 1.62738100  |
| H | 1.71497600  | 0.58355900  | 1.21481000  |
| H | 0.35551500  | -0.21194900 | 2.97083600  |
| H | -1.67426400 | 1.45853700  | 3.33847100  |
| H | -1.22148200 | 3.39622900  | 1.68874200  |
| C | 0.21943700  | 2.04757400  | 0.60600600  |
| C | 0.68588100  | 2.83696100  | -0.38738300 |
| C | 1.76599600  | 2.41021800  | -1.35082200 |
| H | 1.34021000  | 2.00366200  | -2.27970700 |
| H | 2.37804900  | 3.27441700  | -1.63901300 |

|   |             |            |             |
|---|-------------|------------|-------------|
| H | 2.43727100  | 1.65656200 | -0.93347000 |
| C | 0.15828400  | 4.22782900 | -0.64443200 |
| H | -0.70144600 | 4.49572400 | -0.02620000 |
| H | 0.94422100  | 4.97881100 | -0.47861100 |
| H | -0.14340900 | 4.32731700 | -1.69692400 |

**TS-2x**

|   |             |             |             |
|---|-------------|-------------|-------------|
| C | -1.15817700 | -1.00164300 | 0.48077900  |
| C | -1.25100000 | 0.34875600  | 0.82856600  |
| H | -0.36622000 | 0.85434000  | 1.19544700  |
| H | -2.20412400 | 0.75756400  | 1.14138800  |
| N | 1.07174800  | -0.80156600 | 0.16559400  |
| N | 0.02468900  | -1.55464300 | 0.08530400  |
| C | -2.34112900 | -1.89078100 | 0.35889900  |
| C | -3.52281200 | -1.64727100 | 1.08371500  |
| C | -2.30524900 | -3.01580600 | -0.48842200 |
| C | -4.62793600 | -2.48970800 | 0.95946500  |
| H | -3.57421100 | -0.80915000 | 1.77287500  |
| C | -3.40839300 | -3.85936300 | -0.60653900 |
| H | -1.40145900 | -3.21767900 | -1.05339000 |
| C | -4.57850400 | -3.59959400 | 0.11275900  |
| H | -5.52646400 | -2.28252500 | 1.53538900  |
| H | -3.35650100 | -4.71878900 | -1.27046900 |
| H | -5.43887600 | -4.25695900 | 0.01864300  |
| C | 2.20279900  | -1.38629700 | -0.46281500 |
| O | 2.13634800  | -2.21543800 | -1.36599600 |
| C | 3.51306800  | -0.85603000 | 0.02501000  |
| C | 3.60974300  | 0.09659800  | 1.05311800  |
| C | 4.68988700  | -1.35995600 | -0.55378600 |
| C | 4.86045700  | 0.53629800  | 1.48827500  |
| H | 2.70527000  | 0.48925700  | 1.50318700  |
| C | 5.93688500  | -0.92039100 | -0.11764500 |
| H | 4.60516800  | -2.09764600 | -1.34538300 |
| C | 6.02510900  | 0.02936900  | 0.90598600  |
| H | 4.92591500  | 1.27441700  | 2.28328800  |
| H | 6.84088200  | -1.31720000 | -0.57204500 |
| H | 6.99834100  | 0.37305700  | 1.24674300  |
| C | -1.17453100 | 1.58392200  | -1.00580100 |
| C | 0.13598700  | 1.37318900  | -1.45188500 |
| C | 0.95093900  | 2.49183700  | -1.06567600 |
| C | 0.16087300  | 3.43133800  | -0.45502700 |
| H | -2.03666400 | 1.08046600  | -1.42319400 |
| H | 0.46951700  | 0.53243000  | -2.04531200 |
| H | 2.02044000  | 2.56420300  | -1.22722700 |
| H | 0.50430800  | 4.36690200  | -0.03169900 |
| C | -1.21918500 | 2.95738100  | -0.43988700 |
| C | -2.32652500 | 3.64679500  | -0.04184000 |
| C | -3.70476900 | 3.05090400  | -0.06098100 |
| H | -4.13735600 | 3.07986900  | 0.94884500  |
| H | -4.36810600 | 3.65662700  | -0.69376100 |
| H | -3.73276400 | 2.02077500  | -0.41935900 |
| C | -2.27262800 | 5.06917700  | 0.43826900  |
| H | -2.69925400 | 5.14171300  | 1.44798400  |
| H | -1.26548600 | 5.48869500  | 0.45702600  |
| H | -2.89765100 | 5.70425200  | -0.20451400 |

**TS-2n**

|   |             |             |             |
|---|-------------|-------------|-------------|
| C | -0.75093300 | 0.68518000  | -0.79730800 |
| C | -0.72345600 | -0.41350200 | -1.65496300 |
| H | 0.23129100  | -0.73348100 | -2.05080300 |

|   |             |             |             |
|---|-------------|-------------|-------------|
| H | -1.60022700 | -0.68380900 | -2.23107700 |
| N | 1.44384300  | 0.40275300  | -0.32911100 |
| N | 0.35657400  | 1.05080500  | -0.07976600 |
| C | -1.97664800 | 1.47590400  | -0.51551100 |
| C | -3.07903000 | 1.45939400  | -1.38970900 |
| C | -2.05757200 | 2.28789000  | 0.63295400  |
| C | -4.22803100 | 2.20245100  | -1.11315200 |
| H | -3.03573500 | 0.88051500  | -2.30768500 |
| C | -3.20166100 | 3.03548000  | 0.90295500  |
| H | -1.21432100 | 2.31509100  | 1.31444200  |
| C | -4.29743000 | 2.99387600  | 0.03516100  |
| H | -5.06450400 | 2.17277400  | -1.80706700 |
| H | -3.24047400 | 3.64880100  | 1.79990000  |
| H | -5.19045300 | 3.57529300  | 0.24892100  |
| C | 2.46999700  | 0.68604800  | 0.60793200  |
| O | 2.26681900  | 1.08787700  | 1.75061100  |
| C | 3.84748900  | 0.37086400  | 0.11754700  |
| C | 4.10668300  | -0.03073700 | -1.20346100 |
| C | 4.92022600  | 0.50837400  | 1.01399800  |
| C | 5.41457700  | -0.28617600 | -1.61656200 |
| H | 3.28308600  | -0.13864200 | -1.90021300 |
| C | 6.22445900  | 0.24869100  | 0.60126900  |
| H | 4.71029400  | 0.82148100  | 2.03177100  |
| C | 6.47458500  | -0.14952400 | -0.71635100 |
| H | 5.60653400  | -0.59301800 | -2.64133800 |
| H | 7.04684500  | 0.35592000  | 1.30365900  |
| H | 7.49249300  | -0.35209600 | -1.03933100 |
| C | 0.33929100  | -2.16458900 | 0.36951900  |
| C | -0.80823200 | -2.29159500 | -0.41811700 |
| C | -1.40197900 | -1.54259500 | 1.71303800  |
| H | 1.34548200  | -2.41967800 | 0.06223700  |
| H | -0.85725100 | -2.88630800 | -1.32164400 |
| H | -1.96788200 | -1.15824400 | 2.55212100  |
| C | -0.03488700 | -1.66251700 | 1.65840300  |
| C | -1.97338200 | -2.01031100 | 0.45690000  |
| C | -3.29175800 | -2.18755100 | 0.15862500  |
| C | -3.76005400 | -2.68737900 | -1.17840400 |
| H | -4.32228200 | -3.62331800 | -1.05363100 |
| H | -4.45978100 | -1.96797900 | -1.62497200 |
| H | -2.94909700 | -2.86737400 | -1.88608800 |
| C | -4.39499700 | -1.91113100 | 1.13978400  |
| H | -4.03955700 | -1.56632600 | 2.11206900  |
| H | -5.07478900 | -1.15107000 | 0.73058400  |
| H | -4.99908900 | -2.81573900 | 1.29285200  |
| H | 0.65839900  | -1.38998300 | 2.44525800  |

**CA-2x**

|   |             |             |             |
|---|-------------|-------------|-------------|
| C | -1.76555400 | -0.44584100 | 0.04021000  |
| C | -1.58115700 | 1.04760700  | -0.03760000 |
| H | -1.77898300 | 1.47130400  | 0.95584300  |
| H | -2.32892000 | 1.48081400  | -0.70878100 |
| N | 0.51138900  | -0.88624900 | 0.09016900  |
| N | -0.80043900 | -1.29793000 | 0.09779900  |
| C | -3.13971600 | -1.01817800 | 0.06912800  |
| C | -4.26280700 | -0.20290400 | 0.29144500  |
| C | -3.34402000 | -2.39892100 | -0.12140800 |
| C | -5.54790600 | -0.74947300 | 0.32299000  |
| H | -4.14286700 | 0.86363400  | 0.45285300  |
| C | -4.62567100 | -2.94003600 | -0.09457700 |
| H | -2.48346000 | -3.03591300 | -0.29608700 |
| C | -5.73617900 | -2.11796000 | 0.12829600  |
| H | -6.40142100 | -0.10073000 | 0.50180400  |

|   |             |             |             |
|---|-------------|-------------|-------------|
| H | -4.76099000 | -4.00712900 | -0.25134900 |
| H | -6.73652300 | -2.54216700 | 0.14803400  |
| C | 1.41265500  | -1.91207200 | -0.20480300 |
| O | 1.04881100  | -3.03667400 | -0.52566500 |
| C | 2.88399300  | -1.60189500 | -0.11498400 |
| C | 3.50248100  | -1.28968000 | 1.10335600  |
| C | 3.67169700  | -1.77601000 | -1.26282700 |
| C | 4.88936800  | -1.13634000 | 1.16713200  |
| H | 2.90546300  | -1.19632300 | 2.00541800  |
| C | 5.05354400  | -1.60014700 | -1.20043100 |
| H | 3.19624800  | -2.04539900 | -2.20178800 |
| C | 5.66559300  | -1.28126200 | 0.01542000  |
| H | 5.36220000  | -0.90753700 | 2.11849100  |
| H | 5.65352000  | -1.72265400 | -2.09821400 |
| H | 6.74370600  | -1.15421500 | 0.06558300  |
| C | -0.17244900 | 1.46882600  | -0.51088200 |
| C | 0.90505300  | 0.53661300  | 0.09549300  |
| C | 1.19050400  | 1.20534300  | 1.42997400  |
| C | 0.85103100  | 2.50477200  | 1.37043600  |
| H | -0.12915900 | 1.45172400  | -1.60201700 |
| H | 1.80769600  | 0.59464900  | -0.52101900 |
| H | 1.69595600  | 0.71489800  | 2.25340600  |
| H | 1.04940600  | 3.22850300  | 2.15401400  |
| C | 0.17847200  | 2.82669800  | 0.10254300  |
| C | -0.11215400 | 4.04646400  | -0.40004600 |
| C | -0.83414800 | 4.24609100  | -1.70927800 |
| H | -1.77444300 | 4.79414300  | -1.55135800 |
| H | -0.23386100 | 4.86185800  | -2.39448400 |
| H | -1.07378000 | 3.31057300  | -2.22094600 |
| C | 0.25535600  | 5.33183700  | 0.29946300  |
| H | -0.64269700 | 5.93327200  | 0.50066900  |
| H | 0.77738500  | 5.17870400  | 1.24705700  |
| H | 0.90046300  | 5.94944600  | -0.34189500 |

**CA-2n**

|   |             |             |             |
|---|-------------|-------------|-------------|
| C | -1.27194400 | 0.77581700  | -0.46890100 |
| C | -1.07620900 | -0.45678600 | -1.31836400 |
| H | -0.56342800 | -0.14001700 | -2.23797800 |
| H | -2.02696300 | -0.90463100 | -1.60733000 |
| N | 0.95218800  | 0.68779700  | -0.07579700 |
| N | -0.26475700 | 1.35780600  | 0.09573300  |
| C | -2.60194500 | 1.40352600  | -0.28155100 |
| C | -3.63019400 | 1.23266000  | -1.22450700 |
| C | -2.84852000 | 2.21023300  | 0.84509200  |
| C | -4.86578400 | 1.85779900  | -1.04930500 |
| H | -3.46379500 | 0.63124400  | -2.11296300 |
| C | -4.08424100 | 2.82757300  | 1.02048500  |
| H | -2.06170900 | 2.33637700  | 1.58151500  |
| C | -5.09906500 | 2.65380700  | 0.07365300  |
| H | -5.64573800 | 1.72248400  | -1.79395600 |
| H | -4.25976100 | 3.44003600  | 1.90105200  |
| H | -6.06418600 | 3.13382000  | 0.21242000  |
| C | 2.07615700  | 1.47992200  | 0.14357300  |
| O | 1.99794600  | 2.67148500  | 0.42285300  |
| C | 3.42511800  | 0.84308700  | -0.05909900 |
| C | 3.74186900  | 0.10781100  | -1.21112600 |
| C | 4.42740100  | 1.10614100  | 0.88546100  |
| C | 5.03926500  | -0.36949100 | -1.40533800 |
| H | 2.97920100  | -0.07255300 | -1.96361200 |
| C | 5.71759100  | 0.61096600  | 0.69912300  |
| H | 4.18738300  | 1.69971100  | 1.76272200  |
| C | 6.02648700  | -0.12738300 | -0.44701700 |



|   |             |             |             |
|---|-------------|-------------|-------------|
| H | 5.27829200  | -0.92768000 | -2.30658900 |
| H | 6.48384200  | 0.80695400  | 1.44431900  |
| H | 7.03446100  | -0.50519200 | -0.59615400 |
| C | 0.92898600  | -0.77687600 | 0.20670200  |
| C | -0.18065100 | -1.50603100 | -0.60775000 |
| C | -0.43640900 | -1.94326300 | 1.74578600  |
| H | 1.91900100  | -1.15698200 | -0.04338600 |
| H | 0.26801900  | -2.13960900 | -1.37829600 |
| H | -0.82949600 | -2.31888800 | 2.68453400  |
| C | 0.58079900  | -1.07310200 | 1.64803700  |
| C | -0.92943300 | -2.35751200 | 0.42941500  |
| C | -1.83349000 | -3.32749400 | 0.16395600  |
| C | -2.23178300 | -3.72203100 | -1.23728800 |
| H | -2.13603700 | -4.80933400 | -1.36822100 |
| H | -3.28857600 | -3.48374600 | -1.42800300 |
| H | -1.63379200 | -3.24014000 | -2.01486000 |
| C | -2.52786400 | -4.12786000 | 1.23878400  |
| H | -2.26559800 | -3.82108500 | 2.25385900  |
| H | -3.61940000 | -4.04588000 | 1.13557800  |
| H | -2.29055100 | -5.19695000 | 1.13937100  |
| H | 1.12640000  | -0.62810900 | 2.47467600  |

**AD-2-CuL**

|    |             |             |             |
|----|-------------|-------------|-------------|
| C  | -0.09503200 | -2.11957900 | 1.89942200  |
| N  | -0.83805000 | -1.23347100 | 1.05912400  |
| C  | -2.66662300 | -0.81481800 | -0.12785600 |
| O  | -1.98711300 | -0.04876400 | -0.86215800 |
| C  | 0.98683900  | -1.48357800 | 2.69370600  |
| C  | 0.80684100  | -0.20859000 | 3.25760300  |
| C  | 2.19028400  | -2.16604300 | 2.94284200  |
| C  | 1.80429600  | 0.36642500  | 4.04705700  |
| H  | -0.12769600 | 0.32105600  | 3.10346800  |
| C  | 3.18567900  | -1.58966400 | 3.73149600  |
| H  | 2.34968600  | -3.14927800 | 2.50900500  |
| C  | 2.99745200  | -0.32043000 | 4.28485400  |
| H  | 1.64285200  | 1.34713000  | 4.48652800  |
| H  | 4.11081400  | -2.13107000 | 3.90987500  |
| H  | 3.77328600  | 0.12866100  | 4.89879400  |
| Cu | -0.06301300 | 0.01444800  | -0.19740900 |
| C  | 2.80377000  | 1.58759600  | -1.04457600 |
| C  | 2.68655200  | 0.07525900  | -1.02001500 |
| O  | 3.85710300  | -0.55077000 | -1.17836300 |
| C  | 2.06606800  | -2.09264900 | -1.03879900 |
| C  | 3.60504400  | -1.97697300 | -0.99897600 |
| C  | 1.45855400  | 2.28833700  | -1.08308300 |
| O  | 1.48918100  | 3.51199700  | -1.61932100 |
| C  | -0.65277400 | 3.00710800  | -0.73814900 |
| C  | 0.11418400  | 4.00269100  | -1.63691900 |
| N  | 1.64528700  | -0.66945900 | -0.86964000 |
| N  | 0.33153900  | 1.88911500  | -0.60402300 |
| C  | -1.12641900 | 3.58927300  | 0.63020500  |
| C  | 1.47838500  | -2.76077700 | -2.32120600 |
| C  | -4.13426200 | -0.88726300 | -0.21013900 |
| C  | -4.87372900 | -1.74483300 | 0.62554100  |
| C  | -4.80856100 | -0.08249800 | -1.14616600 |
| C  | -6.26193400 | -1.78979100 | 0.52451000  |
| H  | -4.35643500 | -2.37084200 | 1.34409900  |
| C  | -6.19614000 | -0.12957600 | -1.23945600 |
| H  | -4.23303500 | 0.57064900  | -1.79373800 |
| C  | -6.92557000 | -0.98353000 | -0.40511000 |
| H  | -6.82769500 | -2.45414900 | 1.17148700  |
| H  | -6.71080400 | 0.49436300  | -1.96467400 |

|   |             |             |             |
|---|-------------|-------------|-------------|
| H | -8.00872900 | -1.02229000 | -0.48189200 |
| N | -2.04627100 | -1.63908900 | 0.79242700  |
| C | -0.36384200 | -3.43988900 | 1.93044200  |
| H | 0.18273500  | -4.10591400 | 2.58949100  |
| H | -1.14231200 | -3.86923900 | 1.31002700  |
| C | 3.53398200  | 2.04518500  | 0.25322200  |
| H | 3.61830700  | 3.13563700  | 0.26075700  |
| H | 2.99363300  | 1.72427000  | 1.14842700  |
| H | 4.53992800  | 1.61780800  | 0.27581500  |
| C | 3.64517300  | 1.99446100  | -2.28188900 |
| H | 4.62116900  | 1.50825800  | -2.23876900 |
| H | 3.14914300  | 1.70534600  | -3.21380900 |
| H | 3.79324400  | 3.07566700  | -2.28713400 |
| H | 4.13037200  | -2.49762700 | -1.79798000 |
| H | 4.03041200  | -2.26044800 | -0.03341800 |
| H | -0.22008200 | 3.98511400  | -2.67716800 |
| H | 0.13579500  | 5.03038900  | -1.27708900 |
| H | 1.70545900  | -2.65739100 | -0.17552000 |
| C | -0.05641900 | -2.81728600 | -2.21514500 |
| H | -0.49786400 | -1.81817400 | -2.16399500 |
| H | -0.47648000 | -3.32389200 | -3.09195900 |
| H | -0.37376100 | -3.37572500 | -1.32616600 |
| C | 2.01222600  | -4.20643400 | -2.39164300 |
| H | 1.77913900  | -4.76430700 | -1.47587900 |
| H | 1.54510700  | -4.73487600 | -3.23067800 |
| H | 3.09632200  | -4.24713800 | -2.54640300 |
| C | 1.87570400  | -1.99318100 | -3.59426200 |
| H | 1.48093300  | -0.97059300 | -3.58697900 |
| H | 2.96315600  | -1.93966100 | -3.72553200 |
| H | 1.46728200  | -2.49692100 | -4.47788600 |
| C | 0.05458200  | 4.13036300  | 1.45667200  |
| H | -0.31248600 | 4.55319600  | 2.39895100  |
| H | 0.76777200  | 3.33705500  | 1.70847000  |
| H | 0.60073500  | 4.92612800  | 0.93635700  |
| C | -1.85537300 | 2.50072200  | 1.43707900  |
| H | -1.20160900 | 1.64824700  | 1.64279700  |
| H | -2.19326800 | 2.90777700  | 2.39757300  |
| H | -2.73691800 | 2.13272700  | 0.90080200  |
| C | -2.12946000 | 4.72487800  | 0.33952500  |
| H | -2.53336300 | 5.11501000  | 1.28094200  |
| H | -1.67203900 | 5.56666200  | -0.19251200 |
| H | -2.97357400 | 4.36349800  | -0.26084900 |
| H | -1.52951100 | 2.61698700  | -1.25996700 |

**TS-2x-CuL**

|    |             |             |             |
|----|-------------|-------------|-------------|
| C  | 1.51177000  | -1.11007100 | -0.20821800 |
| N  | 0.85221800  | 0.06746200  | -0.00400400 |
| C  | 0.85799600  | 2.15544700  | 0.80699500  |
| O  | -0.40722900 | 2.15316800  | 0.83343600  |
| C  | 0.82389700  | -2.15063100 | -1.01761800 |
| C  | 0.12573300  | -1.81159300 | -2.19114000 |
| C  | 0.91386600  | -3.51057600 | -0.66651800 |
| C  | -0.47259000 | -2.79724600 | -2.97800300 |
| H  | 0.08355300  | -0.77433100 | -2.50631400 |
| C  | 0.31199400  | -4.49485000 | -1.45184900 |
| H  | 1.44740300  | -3.79870200 | 0.23547600  |
| C  | -0.38623100 | -4.14257000 | -2.60974000 |
| H  | -0.99396200 | -2.51401400 | -3.88871100 |
| H  | 0.38808900  | -5.53820300 | -1.15717400 |
| H  | -0.85186900 | -4.90922500 | -3.22293200 |
| Cu | -1.07411700 | 0.31570800  | 0.20384700  |
| C  | -4.14998900 | -1.10787200 | -0.05553000 |

|   |             |             |             |
|---|-------------|-------------|-------------|
| C | -3.06635100 | -1.66742800 | 0.84925900  |
| O | -3.37561200 | -2.87065000 | 1.35729200  |
| C | -1.30599000 | -2.07856500 | 2.18807000  |
| C | -2.20550400 | -3.33043200 | 2.09452200  |
| C | -3.87686300 | 0.31310900  | -0.51588100 |
| O | -4.97874800 | 1.00138800  | -0.84990100 |
| C | -3.00271200 | 2.24197800  | -1.28384200 |
| C | -4.54504100 | 2.34341000  | -1.21742500 |
| N | -1.93062200 | -1.16510800 | 1.18808800  |
| N | -2.74411600 | 0.89799700  | -0.68617300 |
| C | -2.39194000 | 2.42186200  | -2.70775700 |
| C | -1.18900100 | -1.44263400 | 3.60850700  |
| C | 1.60408100  | 3.40043700  | 1.12486300  |
| C | 2.98417200  | 3.39273900  | 1.38838400  |
| C | 0.90467500  | 4.61746800  | 1.18253100  |
| C | 3.64824700  | 4.57952500  | 1.69545700  |
| H | 3.52709100  | 2.45520800  | 1.36482400  |
| C | 1.57364400  | 5.80364800  | 1.47733500  |
| H | -0.16332700 | 4.61926000  | 0.99167900  |
| C | 2.94763300  | 5.78844200  | 1.73532300  |
| H | 4.71411000  | 4.56101500  | 1.90711300  |
| H | 1.02337200  | 6.74014900  | 1.51066600  |
| H | 3.46848000  | 6.71261500  | 1.97144900  |
| N | 1.59812500  | 1.05435500  | 0.50571000  |
| C | 2.83776300  | -1.30601100 | 0.20381200  |
| H | 3.23768200  | -2.31090700 | 0.15570700  |
| H | 3.26616600  | -0.65024000 | 0.95083000  |
| C | -4.24367000 | -2.00552900 | -1.32414100 |
| H | -5.00609200 | -1.60889200 | -2.00096300 |
| H | -3.28702900 | -2.04483000 | -1.85291600 |
| H | -4.52724000 | -3.02142800 | -1.03662900 |
| C | -5.49693000 | -1.15911200 | 0.71226400  |
| H | -5.70314700 | -2.18372900 | 1.02692500  |
| H | -5.47534800 | -0.51817700 | 1.59949600  |
| H | -6.30674400 | -0.82335200 | 0.06201300  |
| H | -2.55818100 | -3.71967800 | 3.04899300  |
| H | -1.75269700 | -4.13824200 | 1.51420500  |
| H | -4.89577500 | 3.02323600  | -0.43690000 |
| H | -5.03249900 | 2.59202700  | -2.15938700 |
| H | -0.29448100 | -2.31235600 | 1.84503600  |
| C | -0.25330000 | -0.22217100 | 3.54667400  |
| H | -0.62677300 | 0.53646900  | 2.85390900  |
| H | -0.16536700 | 0.23838200  | 4.53793000  |
| H | 0.75509100  | -0.50907200 | 3.22444000  |
| C | -0.56379300 | -2.48908400 | 4.55319200  |
| H | 0.39734600  | -2.85151600 | 4.16680900  |
| H | -0.37934700 | -2.04134500 | 5.53669900  |
| H | -1.21508500 | -3.35658800 | 4.70869200  |
| C | -2.56246900 | -1.00551500 | 4.14807100  |
| H | -3.00275800 | -0.21617400 | 3.52841300  |
| H | -3.27449200 | -1.83821200 | 4.19855100  |
| H | -2.45687000 | -0.60597000 | 5.16347000  |
| C | -2.92514300 | 1.36378300  | -3.69039500 |
| H | -2.50442300 | 1.53288600  | -4.68850500 |
| H | -2.64557800 | 0.35034300  | -3.38120200 |
| H | -4.01694300 | 1.39740200  | -3.78944700 |
| C | -0.85733000 | 2.32265700  | -2.62931100 |
| H | -0.53781800 | 1.36171300  | -2.21672800 |
| H | -0.41941200 | 2.42969500  | -3.62919000 |
| H | -0.44085300 | 3.11303500  | -1.99430500 |
| C | -2.75556300 | 3.83457300  | -3.21069000 |
| H | -2.26623100 | 4.02584600  | -4.17307200 |
| H | -3.83292100 | 3.96588100  | -3.36378200 |

|   |             |             |             |
|---|-------------|-------------|-------------|
| H | -2.41760600 | 4.60530500  | -2.50655600 |
| H | -2.54215500 | 2.98615300  | -0.62941600 |
| C | 6.11166500  | 0.24497500  | -0.41156700 |
| C | 4.20146400  | -0.69854200 | -1.38816800 |
| C | 4.08696300  | 0.69862500  | -1.36488800 |
| H | 7.05776700  | 0.36788700  | 0.10031700  |
| H | 3.67534600  | -1.32781000 | -2.09484700 |
| H | 3.25745500  | 1.26633300  | -1.76663600 |
| C | 5.23918800  | 1.25935200  | -0.73054800 |
| H | 5.38913300  | 2.31426400  | -0.53366900 |
| C | 5.54935600  | -1.02283800 | -0.85242000 |
| C | 6.15308100  | -2.24800100 | -0.82677300 |
| C | 7.55159900  | -2.45816200 | -0.32412500 |
| H | 8.17929500  | -2.86128100 | -1.13069000 |
| H | 8.02518700  | -1.55320900 | 0.05869500  |
| H | 7.55196000  | -3.21650800 | 0.47030500  |
| C | 5.47643900  | -3.49554800 | -1.31362400 |
| H | 4.46123900  | -3.33335500 | -1.67892200 |
| H | 6.06750600  | -3.94910500 | -2.12105800 |
| H | 5.44371600  | -4.24064600 | -0.50672700 |

**TS-2n-CuL**

|    |             |             |             |
|----|-------------|-------------|-------------|
| C  | 2.69356200  | -1.50786900 | 1.45210100  |
| C  | 1.52604300  | -1.27830200 | 0.71616500  |
| N  | 1.04956100  | -0.00612000 | 0.53099500  |
| N  | 1.82825400  | 0.95265200  | 1.01983000  |
| C  | 4.35701200  | 0.08578600  | -0.22695600 |
| C  | 4.46460200  | -1.25146200 | 0.17745300  |
| C  | 1.25782800  | 2.19327000  | 0.90238900  |
| O  | 0.04424600  | 2.35466400  | 0.59421300  |
| C  | 0.79695800  | -2.39652300 | 0.06428900  |
| C  | 0.27013400  | -2.28148800 | -1.23473200 |
| C  | 0.64468800  | -3.62582400 | 0.73098000  |
| C  | -0.38019100 | -3.35494300 | -1.84196600 |
| H  | 0.41207900  | -1.35701500 | -1.78386500 |
| C  | -0.00768400 | -4.70093800 | 0.12410300  |
| H  | 1.02640900  | -3.73788200 | 1.74253200  |
| C  | -0.52452400 | -4.57008300 | -1.16595700 |
| H  | -0.75682300 | -3.25056900 | -2.85630300 |
| H  | -0.11232400 | -5.63958400 | 0.66150900  |
| H  | -1.02783000 | -5.40637000 | -1.64244800 |
| Cu | -0.79034100 | 0.54669900  | 0.17395000  |
| C  | -3.94988600 | -0.45097300 | -0.58537800 |
| C  | -3.18976100 | -0.96677300 | 0.62212800  |
| O  | -3.79646900 | -2.00275900 | 1.22409400  |
| C  | -1.87571600 | -1.30190500 | 2.41348500  |
| C  | -2.91156100 | -2.44267900 | 2.29146700  |
| C  | -3.29370800 | 0.74843800  | -1.24568500 |
| O  | -4.14009000 | 1.49084200  | -1.97643800 |
| C  | -1.90903000 | 2.28635100  | -2.13269900 |
| C  | -3.37919000 | 2.61390600  | -2.49809600 |
| N  | -2.09524000 | -0.54327800 | 1.14946900  |
| N  | -2.05531800 | 1.09646900  | -1.24236600 |
| C  | -0.96899000 | 2.04969600  | -3.35460200 |
| C  | -2.00025500 | -0.41133100 | 3.68864000  |
| C  | 2.13122700  | 3.35777500  | 1.16685400  |
| C  | 3.39498700  | 3.21527900  | 1.76496700  |
| C  | 1.67398900  | 4.64180600  | 0.82852300  |
| C  | 4.18788300  | 4.33447200  | 2.00599500  |
| H  | 3.73248200  | 2.22898800  | 2.06186200  |
| C  | 2.47398600  | 5.75705700  | 1.06006700  |
| H  | 0.68858500  | 4.74654200  | 0.38753200  |

|   |             |             |             |
|---|-------------|-------------|-------------|
| C | 3.73310800  | 5.60631400  | 1.64786000  |
| H | 5.15904900  | 4.21738500  | 2.47838000  |
| H | 2.11519400  | 6.74586400  | 0.78912700  |
| H | 4.35409000  | 6.47796700  | 1.83412200  |
| H | 2.96856200  | -2.53059800 | 1.67822400  |
| H | 3.02587100  | -0.74714100 | 2.14556300  |
| C | -4.04066100 | -1.58490400 | -1.64809500 |
| H | -4.58145300 | -1.22135200 | -2.52608500 |
| H | -3.04464100 | -1.91715000 | -1.95499200 |
| H | -4.58088800 | -2.43760700 | -1.23026200 |
| C | -5.38043300 | -0.06856200 | -0.11274400 |
| H | -5.85551100 | -0.93358200 | 0.35301300  |
| H | -5.35290700 | 0.74911900  | 0.61446500  |
| H | -5.97992400 | 0.25082500  | -0.96646600 |
| H | -3.52645900 | -2.60211300 | 3.17660700  |
| H | -2.46586200 | -3.39000400 | 1.97582400  |
| H | -3.75531100 | 3.51734200  | -2.01148700 |
| H | -3.58153800 | 2.67060700  | -3.56750000 |
| H | -0.86056900 | -1.70772900 | 2.38866400  |
| C | -0.91749400 | 0.68380000  | 3.65549100  |
| H | -1.03931100 | 1.35075400  | 2.79781200  |
| H | -0.96946700 | 1.29313500  | 4.56453100  |
| H | 0.08804500  | 0.24872500  | 3.60524500  |
| C | -1.75336700 | -1.30564400 | 4.92185900  |
| H | -0.77708500 | -1.80316500 | 4.86597300  |
| H | -1.76135100 | -0.69706000 | 5.83235700  |
| H | -2.52050700 | -2.07869200 | 5.04522500  |
| C | -3.38917700 | 0.24621200  | 3.78746900  |
| H | -3.57076700 | 0.92346700  | 2.94571400  |
| H | -4.20087700 | -0.49041400 | 3.81708600  |
| H | -3.45821700 | 0.83961900  | 4.70544700  |
| C | -1.44200900 | 0.85727000  | -4.20609100 |
| H | -0.78296500 | 0.72669200  | -5.07142600 |
| H | -1.42516400 | -0.07476500 | -3.63017100 |
| H | -2.45793100 | 0.99671100  | -4.59437300 |
| C | 0.46740600  | 1.79274300  | -2.86223700 |
| H | 0.52736400  | 0.89953200  | -2.23474900 |
| H | 1.13776400  | 1.65440200  | -3.71863700 |
| H | 0.84170500  | 2.63787700  | -2.27361400 |
| C | -0.95777700 | 3.33611500  | -4.20831800 |
| H | -0.24331300 | 3.23196300  | -5.03205500 |
| H | -1.93306600 | 3.55698900  | -4.65610800 |
| H | -0.65287400 | 4.20622900  | -3.61428600 |
| H | -1.47395000 | 3.08753200  | -1.52852700 |
| C | 3.68075200  | -1.15220900 | -2.01980100 |
| H | 3.28345300  | -1.42633700 | -2.98835600 |
| H | 4.63831500  | 0.94800700  | 0.36121300  |
| H | 5.11485100  | -1.57388200 | 0.98142100  |
| C | 3.82825100  | 0.13186700  | -1.55240100 |
| H | 3.58358300  | 1.03836800  | -2.09251300 |
| C | 4.14107900  | -2.08915400 | -1.00656600 |
| C | 4.27669000  | -3.43966500 | -1.12906400 |
| C | 3.95290500  | -4.18113400 | -2.39579500 |
| H | 3.15495900  | -4.91176000 | -2.20667300 |
| H | 3.63665700  | -3.53272900 | -3.21339200 |
| H | 4.82585800  | -4.75528200 | -2.73251700 |
| C | 4.76936000  | -4.31238400 | -0.00867400 |
| H | 5.00017900  | -3.76397900 | 0.90603700  |
| H | 4.02081800  | -5.08108100 | 0.22611900  |
| H | 5.67439400  | -4.85154600 | -0.31836500 |

CA-2x-CuL

|    |             |             |             |
|----|-------------|-------------|-------------|
| C  | 1.26000000  | -1.45863800 | -0.87741100 |
| N  | 0.89875000  | -0.28677200 | -0.42611500 |
| C  | 1.41782400  | 1.69158600  | 0.69870600  |
| O  | 0.21386500  | 1.79247200  | 0.99915200  |
| C  | 0.24965800  | -2.29998600 | -1.55387400 |
| C  | -0.76726600 | -1.73361600 | -2.34414100 |
| C  | 0.32498000  | -3.70327800 | -1.46308100 |
| C  | -1.67919000 | -2.54377300 | -3.01806100 |
| H  | -0.81984500 | -0.65574100 | -2.44653400 |
| C  | -0.60211200 | -4.51103800 | -2.12221000 |
| H  | 1.10108000  | -4.16902000 | -0.86332000 |
| C  | -1.60621000 | -3.93555700 | -2.90437700 |
| H  | -2.44144000 | -2.08912300 | -3.64520700 |
| H  | -0.53366800 | -5.59146400 | -2.02926900 |
| H  | -2.31922000 | -4.56510700 | -3.42950000 |
| Cu | -0.93936000 | 0.28844100  | 0.14856300  |
| C  | -4.29471300 | -0.26487900 | 0.32441300  |
| C  | -3.26818200 | -1.23346500 | 0.88336800  |
| O  | -3.80176400 | -2.42210100 | 1.22643500  |
| C  | -1.51423200 | -2.28299200 | 1.80952700  |
| C  | -2.69852300 | -3.26410800 | 1.66472900  |
| C  | -3.71049300 | 1.05812300  | -0.14152100 |
| O  | -4.63165700 | 2.03492100  | -0.23624200 |
| C  | -2.48898100 | 2.76288600  | -0.95140800 |
| C  | -3.94492600 | 3.22841300  | -0.70339600 |
| N  | -2.01180900 | -1.06863000 | 1.10306700  |
| N  | -2.50764000 | 1.33942200  | -0.49836900 |
| C  | -1.97305900 | 2.95585600  | -2.40948500 |
| C  | -1.05901600 | -1.99437600 | 3.27392200  |
| C  | 2.33362300  | 2.82229100  | 1.04961000  |
| C  | 2.99515300  | 3.57812100  | 0.07105900  |
| C  | 2.41496700  | 3.20916300  | 2.39600200  |
| C  | 3.74416700  | 4.69645800  | 0.44041100  |
| H  | 2.90724900  | 3.31164800  | -0.97835500 |
| C  | 3.18107300  | 4.31522400  | 2.76170300  |
| H  | 1.88223300  | 2.63869900  | 3.15123400  |
| C  | 3.84709600  | 5.06037500  | 1.78479700  |
| H  | 4.24476000  | 5.28339300  | -0.32447500 |
| H  | 3.25134500  | 4.59917600  | 3.80796400  |
| H  | 4.43820500  | 5.92630800  | 2.06977300  |
| N  | 1.89467700  | 0.57103600  | 0.06704500  |
| C  | 2.66350900  | -1.97235100 | -0.72713000 |
| H  | 2.83343400  | -2.82491800 | -1.38602100 |
| H  | 2.81135600  | -2.31990200 | 0.30528800  |
| C  | -5.00327400 | -0.92205600 | -0.89420000 |
| H  | -5.72817000 | -0.22246500 | -1.31962800 |
| H  | -4.28188700 | -1.19705000 | -1.66950000 |
| H  | -5.53399100 | -1.82244200 | -0.57531700 |
| C  | -5.33958600 | 0.00067200  | 1.44431900  |
| H  | -5.74522000 | -0.94889300 | 1.80007900  |
| H  | -4.88824300 | 0.52864100  | 2.29054300  |
| H  | -6.15903000 | 0.60702200  | 1.05363900  |
| H  | -3.00953700 | -3.75428800 | 2.58669700  |
| H  | -2.53308000 | -4.01847000 | 0.89091500  |
| H  | -4.02687100 | 3.98458400  | 0.08071300  |
| H  | -4.47109400 | 3.57457100  | -1.59360400 |
| H  | -0.64459200 | -2.65588200 | 1.26115400  |
| C  | 0.11321300  | -0.99635800 | 3.25771500  |
| H  | -0.17147300 | -0.05129200 | 2.78727400  |
| H  | 0.44391100  | -0.78393700 | 4.28163700  |
| H  | 0.97375300  | -1.40116900 | 2.71025300  |
| C  | -0.56567400 | -3.31749200 | 3.89298800  |
| H  | 0.23416200  | -3.76509800 | 3.28956200  |

|   |             |             |             |
|---|-------------|-------------|-------------|
| H | -0.16279900 | -3.13489100 | 4.89611000  |
| H | -1.36658600 | -4.05902500 | 3.99326400  |
| C | -2.20476400 | -1.41528100 | 4.12359800  |
| H | -2.54745300 | -0.45108800 | 3.73149100  |
| H | -3.06820700 | -2.08915800 | 4.17624000  |
| H | -1.86169700 | -1.24885900 | 5.15159600  |
| C | -2.78303800 | 2.11611400  | -3.41236600 |
| H | -2.41787600 | 2.29070100  | -4.43132900 |
| H | -2.69073000 | 1.04421400  | -3.20559500 |
| H | -3.85007700 | 2.37005600  | -3.40230300 |
| C | -0.48759900 | 2.55707400  | -2.47765100 |
| H | -0.33220600 | 1.53466700  | -2.12175600 |
| H | -0.11817500 | 2.62559400  | -3.50797900 |
| H | 0.12363900  | 3.22435800  | -1.85771000 |
| C | -2.08441300 | 4.45132100  | -2.77080800 |
| H | -1.62884300 | 4.63427600  | -3.75128200 |
| H | -3.12352600 | 4.79494500  | -2.82691300 |
| H | -1.56004200 | 5.07727800  | -2.03778700 |
| H | -1.80341100 | 3.30182900  | -0.29018500 |
| C | 5.19450700  | -0.69172100 | 0.80974100  |
| C | 3.68762300  | -0.86558400 | -1.03014600 |
| C | 3.35581700  | 0.37996100  | -0.18143200 |
| H | 5.98763900  | -0.93355900 | 1.50920200  |
| H | 3.66055800  | -0.63293800 | -2.09701900 |
| H | 3.69290500  | 1.26962200  | -0.71859500 |
| C | 4.20494800  | 0.18203900  | 1.05931100  |
| H | 4.07101000  | 0.75431200  | 1.96967300  |
| C | 5.07747100  | -1.27288400 | -0.53185000 |
| C | 5.97810400  | -2.03231700 | -1.19346300 |
| C | 7.32739000  | -2.39034400 | -0.62186700 |
| H | 8.13039900  | -2.01045000 | -1.26951400 |
| H | 7.49487700  | -1.99464400 | 0.38262700  |
| H | 7.45474600  | -3.48134100 | -0.58335500 |
| C | 5.72731600  | -2.58861300 | -2.57244300 |
| H | 4.76524700  | -2.28929700 | -2.99498500 |
| H | 6.51645000  | -2.26903800 | -3.26776300 |
| H | 5.76095400  | -3.68765600 | -2.55619000 |

**CA-2n-CuL**

|    |             |             |             |
|----|-------------|-------------|-------------|
| C  | 1.37618300  | -1.51702100 | -0.01416900 |
| N  | 0.98991700  | -0.26355500 | -0.02779900 |
| C  | 1.49580900  | 1.80044600  | 0.96711600  |
| O  | 0.26681400  | 1.95160800  | 1.13961900  |
| C  | 0.57281100  | -2.51704400 | -0.73996700 |
| C  | -0.11880200 | -2.16214500 | -1.91531000 |
| C  | 0.51098000  | -3.85529600 | -0.30456000 |
| C  | -0.85380800 | -3.11049500 | -2.62290900 |
| H  | -0.04430900 | -1.14592900 | -2.28697400 |
| C  | -0.23734600 | -4.79885300 | -1.00898500 |
| H  | 1.03221600  | -4.16242000 | 0.59689600  |
| C  | -0.92244000 | -4.43183300 | -2.16966500 |
| H  | -1.36282500 | -2.82203400 | -3.53864400 |
| H  | -0.27864600 | -5.82425100 | -0.65212100 |
| H  | -1.49450000 | -5.17099600 | -2.72351500 |
| Cu | -0.84935500 | 0.49281600  | 0.19527900  |
| C  | -4.16323700 | -0.16734500 | -0.29151300 |
| C  | -3.28530600 | -1.00264400 | 0.62351700  |
| O  | -3.88560500 | -2.14217000 | 1.01884100  |
| C  | -1.79671400 | -1.83763700 | 2.07775500  |
| C  | -2.90803000 | -2.87450900 | 1.80993200  |
| C  | -3.50308500 | 1.10361600  | -0.79400300 |
| O  | -4.37944000 | 2.00808000  | -1.26951500 |

|   |             |             |             |
|---|-------------|-------------|-------------|
| C | -2.13646600 | 2.69812400  | -1.59092900 |
| C | -3.60565800 | 3.17243700  | -1.67483200 |
| N | -2.10954400 | -0.76615600 | 1.08901800  |
| N | -2.25265600 | 1.38613600  | -0.88960500 |
| C | -1.39056300 | 2.59572600  | -2.95634400 |
| C | -1.71364000 | -1.31079400 | 3.54438700  |
| C | 2.41504200  | 2.90193400  | 1.39021000  |
| C | 3.27749600  | 3.56901100  | 0.50782200  |
| C | 2.30072200  | 3.35292000  | 2.71522800  |
| C | 4.02682100  | 4.65982600  | 0.95191400  |
| H | 3.35149500  | 3.25450300  | -0.52800500 |
| C | 3.06574700  | 4.43004300  | 3.15878100  |
| H | 1.61583800  | 2.85275300  | 3.39333200  |
| C | 3.92929600  | 5.08677300  | 2.27769100  |
| H | 4.68471800  | 5.17577900  | 0.25823600  |
| H | 2.98221600  | 4.76096900  | 4.19015300  |
| H | 4.51939900  | 5.93161300  | 2.62191500  |
| N | 1.97272100  | 0.62833600  | 0.45800400  |
| C | 2.61341700  | -1.90212800 | 0.75505300  |
| H | 2.82614300  | -2.96550000 | 0.65639100  |
| H | 2.42077500  | -1.69335600 | 1.81732200  |
| C | -4.54583100 | -1.01504900 | -1.53894500 |
| H | -5.16704100 | -0.41873400 | -2.21286700 |
| H | -3.65322800 | -1.34415400 | -2.07972500 |
| H | -5.11236100 | -1.89695000 | -1.23034100 |
| C | -5.44988700 | 0.19667800  | 0.50012000  |
| H | -5.93094100 | -0.71437500 | 0.86210500  |
| H | -5.21946400 | 0.83587900  | 1.35869800  |
| H | -6.14859600 | 0.72736600  | -0.14941600 |
| H | -3.42054200 | -3.24547000 | 2.69698000  |
| H | -2.56263000 | -3.71884400 | 1.20712200  |
| H | -3.83437200 | 3.97916400  | -0.97370900 |
| H | -3.94164800 | 3.45520300  | -2.67247100 |
| H | -0.82010200 | -2.25712700 | 1.82201800  |
| C | -0.57764900 | -0.27797900 | 3.65388900  |
| H | -0.73926400 | 0.57275700  | 2.98698400  |
| H | -0.50702400 | 0.10023300  | 4.68108800  |
| H | 0.39205400  | -0.72551300 | 3.40017700  |
| C | -1.37945000 | -2.50306000 | 4.46351200  |
| H | -0.45263700 | -3.00016600 | 4.14964100  |
| H | -1.23735400 | -2.15524700 | 5.49340500  |
| H | -2.17553300 | -3.25592900 | 4.48076400  |
| C | -3.03598800 | -0.66164800 | 3.99186200  |
| H | -3.27486700 | 0.22085600  | 3.38744400  |
| H | -3.88223400 | -1.35652700 | 3.93099600  |
| H | -2.95972000 | -0.33399400 | 5.03540200  |
| C | -2.08682300 | 1.60918600  | -3.91103400 |
| H | -1.54461100 | 1.56322400  | -4.86295300 |
| H | -2.11023300 | 0.59546900  | -3.49550000 |
| H | -3.11784400 | 1.90561600  | -4.13946100 |
| C | 0.05344100  | 2.12894600  | -2.69990900 |
| H | 0.06797900  | 1.18336500  | -2.15062100 |
| H | 0.58881500  | 1.99203700  | -3.64716000 |
| H | 0.60353000  | 2.87130200  | -2.10787000 |
| C | -1.34958100 | 3.99880200  | -3.59393700 |
| H | -0.75594800 | 3.97700400  | -4.51566100 |
| H | -2.34757200 | 4.36651600  | -3.85927900 |
| H | -0.88875900 | 4.72975300  | -2.91763700 |
| H | -1.55737600 | 3.36867300  | -0.94880800 |
| C | 4.17685100  | -0.52444900 | -1.99571200 |
| C | 3.38063100  | 0.39211100  | 0.03187800  |
| C | 3.84246100  | -1.06617300 | 0.32173500  |
| H | 4.44412000  | -0.61129100 | -3.04333900 |



|   |            |             |             |
|---|------------|-------------|-------------|
| H | 3.97547800 | 1.11318900  | 0.59330000  |
| H | 4.56621000 | -1.08083800 | 1.14115300  |
| C | 3.56606500 | 0.54523500  | -1.46080400 |
| H | 3.25511800 | 1.43577800  | -1.99718700 |
| C | 4.47727900 | -1.54472100 | -0.99109300 |
| C | 5.19794400 | -2.67545900 | -1.16522600 |
| C | 5.77603600 | -3.08886500 | -2.49608800 |
| H | 5.45678600 | -4.10952100 | -2.74969900 |
| H | 5.48745800 | -2.43429300 | -3.32168200 |
| H | 6.87440500 | -3.11290500 | -2.45239700 |
| C | 5.50650800 | -3.63420700 | -0.04223800 |
| H | 5.20545400 | -3.26664000 | 0.94204400  |
| H | 5.01368400 | -4.60339900 | -0.20703300 |
| H | 6.58497700 | -3.84248500 | -0.00683000 |

**Table S1** Values of different terms used in the equation (1). Second column includes values of thermal correction to energy calculated at B3LYP/6-31G(d) level at 25°C in DCM, third column includes values of entropy calculated at B3LYP/6-31G(d) level at 25°C in DCM, fourth column includes values of total electronic energy obtained *via* single-point energy calculation at B3LYP-D3(BJ)/def2-TZVP level in DCM, and last column includes values of absolute Gibbs free energies in DCM at 25°C.

| Stationary point | (U <sub>T</sub> -U <sub>0</sub> )+ZPVE<br>(a.u.) | S<br>(cal/mol.K) | E <sup>ele</sup><br>(a.u.) | G<br>(a.u.)    |
|------------------|--------------------------------------------------|------------------|----------------------------|----------------|
| <b>AD-2</b>      | 0.24902700                                       | 128.323          | -763.85051600              | -763.66242867  |
| <b>FU-3</b>      | 0.16248900                                       | 86.589           | -310.98945100              | -310.86808249  |
| <b>TS-1x</b>     | 0.41378000                                       | 168.587          | -1074.83261900             | -1074.49889976 |
| <b>TS-1n</b>     | 0.41367000                                       | 166.402          | -1074.83456500             | -1074.49991812 |
| <b>CA-1x</b>     | 0.41855900                                       | 159.500          | -1074.90288000             | -1074.56006640 |
| <b>CA-1n</b>     | 0.41887800                                       | 160.283          | -1074.91063400             | -1074.56787325 |
| <b>TS-2x</b>     | 0.41394000                                       | 166.833          | -1074.83676200             | -1074.50204979 |
| <b>TS-2n</b>     | 0.41373000                                       | 168.022          | -1074.84243700             | -1074.50849944 |
| <b>CA-2x</b>     | 0.41907600                                       | 161.531          | -1074.91028400             | -1074.56791791 |
| <b>CA-2n</b>     | 0.41912900                                       | 159.668          | -1074.91301000             | -1074.56970619 |
| <b>AD-2-CuL</b>  | 0.72501700                                       | 216.688          | -3330.69687700             | -3330.07476358 |
| <b>TS-2x-CuL</b> | 0.88672800                                       | 252.954          | -3641.68872700             | -3640.92212504 |
| <b>TS-2n-CuL</b> | 0.88444000                                       | 248.569          | -3641.69520700             | -3640.92881063 |
| <b>CA-2x-CuL</b> | 0.89206700                                       | 251.491          | -3641.75368800             | -3640.98105227 |
| <b>CA-2n-CuL</b> | 0.89318500                                       | 246.774          | -3641.75675200             | -3640.98075820 |
